# Supplementary material for: The importance of living well now and relationships: A qualitative study of the barriers and enablers to engaging frail elders with advance care planning
Source: PubMed Central journal article supplement (PMC8189003; doi:10.1177/02692163211013260), 2021-05-03
Supplement: sj-pdf-4-pmj-10.1177_02692163211013260.pdf [file sj-pdf-4-pmj-10.1177_02692163211013260.pdf]

## Supplementary material 4: GRIPP2 short form

| Section and topic                   | Item                                                                                                                                      | Reported on page No |
|-------------------------------------|-------------------------------------------------------------------------------------------------------------------------------------------|---------------------|
| 1: Aim                              | Report the aim of PPI in the study                                                                                                        | 5, 16               |
| 2: Methods                          | Provide a clear description of the methods used for PPI in the study                                                                      | 5                   |
| 3: Study results                    | Outcomes—Report the results of PPI in the study, including both positive and negative outcomes                                            | 5, 16               |
| 4: Discussion and conclusions       | Outcomes—Comment on the extent to which PPI influenced the study overall. Describe positive and negative effects                          | 5, 16               |
| 5: Reflections/critical perspective | Comment critically on the study, reflecting on the things that went well and those that did not, so others can learn from this experience | 16                  |

PPI=patient and public involvement

Staniszewska S, Brett J, Simera I, et al. GRIPP2 reporting checklists: tools to improve reporting of patient and public involvement in research. *Research involvement and engagement* 2017; 3: 13.
